Articles of interest in other COB journals

From *Journal of Cell Science*

**Hairless induces cell death by downregulation of EGFR signalling activity**

Cornelia E. Protzer, Irmgard Wech and Anja C. Nagel

Protzer, C. E. et al. 2008. *J. Cell Sci.* doi:10.1242/jcs.035014

**STRA8-deficient spermatocytes initiate, but fail to complete, meiosis and undergo premature chromosome condensation**

Manuel Mark, Hugues Jacobs, Mustapha Oulad-Abdelghani, Christine Dennefeld, Betty Féret, Nadège Vernet, Carmen-Alina Codreanu, Pierre Chambon and Norbert B. Ghyselinck

Mark, M. et al. 2008. *J. Cell Sci.* doi:10.1242/jcs.035071
